# Supplementary material
Source: PubMed Central journal article supplement (PMC1312386)
Supplement: pnas_0506483102_2.pdf [file pnas_0506483102_2.pdf]

```
** *
Human MATE1 MEAPEEPAPVRGGPEATLEVR-----GSRCLRLSAFREELRALLVLGAPFLVQLMVFLISFISSVFCGHLGKLELDAVTLAIAVI 81
Mouse MATE1 MERTEESAPGGGADAASERR-----GLRCLLLPGFLEELRALLVLGAPFLAQLMMFLISFISSVFCGHLGKLELDAVTLAIAVI 81
Mouse MATE2 MEPAEDSLGATIQPPELVRVPRGSLRILLGLRGALSPDVRREAALVALAGPVFLAQLMIFLISIVSSIFCGHLGKVELDAVTLAVSVV 90

**** ** * ***** * * ** * ***** * ***** * ** * ***** **
Human MATE1 NVTGVSVGFGLSSACDTLISQTYGSQNLKHVGVILQRSALVLLCCFPCWALFLNTQHILLFRQDPDVSRLTQTYVTIFIPALPATFLY 171
Mouse MATE1 NVTGISVGHGLSSACDTLISQTYGSQNLKHVGVILRQGTLLILLCCFPCWALFINTEQILLFRQDPDVSRLTQTYVMIFIPALPAAFLY 171
Mouse MATE2 NVTGISVGTGLASACDTLMSQSFGGKLNKRVGIVLQRGITLLILLCCFPCWAIFLNTERLLLLLRQDPDVARLAQVYVMICIPALPAAFLY 180

** ** *** * * **** * * * * **** * * * * **** * ***** * * * * *
Human MATE1 MLQVKYLLNQGIVLPQIVTGVAANLVNALANYVFLHQLHLGVIGSALANLISQYTLALLFLYILGKKLHQATWGGWSLECLQDWSAFLR 261
Mouse MATE1 TLQVKYLLNQGIVLPQIMTGIAANLVNALANYVFLYHLHLGVMGSALANTISQFALAIFFLYILWRRHLHQATWGGWSWECLQDWSAFLR 261
Mouse MATE2 QLQTRYLQSQGIIMPQVIVGIAANVVNVGMNAFLLYALDLGVVGSAWANTTSQFFLSALLFLYVWVKRIHIHTWGGWTRECFQEWSSYTR 270

***** * * *** * * * * * ***** ***** ** * * * * *
Human MATE1 LAIPSMMLMCIEMWAYEVSFSLSGILGMVELGAQSIVYELAIIVYMPAGFSAASVVRVGNALGAGDMEQARKSSTVSLITVLFVAVFS 351
Mouse MATE1 LAIPSMMLMCIEMWAYEVSFSLSGILGMVELGAQSITYELAIIVYMIPSGFSAANVVRVGNALGAGNIDQAKKSSAISLIVTELFAVTEFC 351
Mouse MATE2 LAIPSMFMVCIEMWTFEIGTFLAGLVNVTDELGAQAVIYELASVAYMVPFGFGVAASVVRVGNALGAGNADQARCSCTTVLLCAGVCALLVG 360

E273
** ** * ***** * * ** * * * * * ** * * * * * ** * * * * * * * * * * *
Human MATE1 VLLLCKDHVGYIFTDRDIINLVAQVPIYAVSHLFEALACTSGGVL RSGSNQKVGAIVNTIGYYVGLPIGIALMFATTLGVMGLWSG 441
Mouse MATE1 VLLLCKDLVGYIFTDRDIVALVAQVPIYAVSHLFEGLACTCGGIL RGTGNQKVGAIVNAIGYYVIGLPIGIALMFAAKLGVIGLWSG 441
Mouse MATE2 ILLAALKDVVAYIFTNDKDIISLVSQVMPIFAPFHLFDALAGTCGGVL RGTGKQKIGAVLNTIGYYGFGFPIGVSLMFAAKLGIIGLWAG 450

* * * * *
Human MATE1 IIICTVFQAVCFGLFIIQLNWKKACQQAQVHANLKVNNVPRSGNSALPQDPLHPGCP-ENLEGILTNDVGKTGEPQSDQQMRQEPLPEH 530
Mouse MATE1 IIICTTCQTTCLAFIARLNWKKACQQAQVHANLKVN---VALNSAVSHEPAHPVCP-ESHGEIMMTDLEKK---RRDSVGPADEPATSF 524
Mouse MATE2 LIVCVSFQAFSYLIYILRTNWSRVAEQAVRAGLKST-----KELIPTPADLPILEREVMGIVLPDIIRP-ESQTGQLVVEENSQCAV

*
Human MATE1 PQDGAKLSRKQLVLRRLGLLLGVFLILLVGVILVRFVYRIQ 570
Mouse MATE1 AYP----SKGQQ----- 532
Mouse MATE2 PTVGEVL TGRQLVFYRGMALT VSVAVLIAGIVRVFVNDRG 573
```
