# Supplementary material
Source: PubMed Central journal article supplement (PMC1312386)

# Mouse Chromosome 11

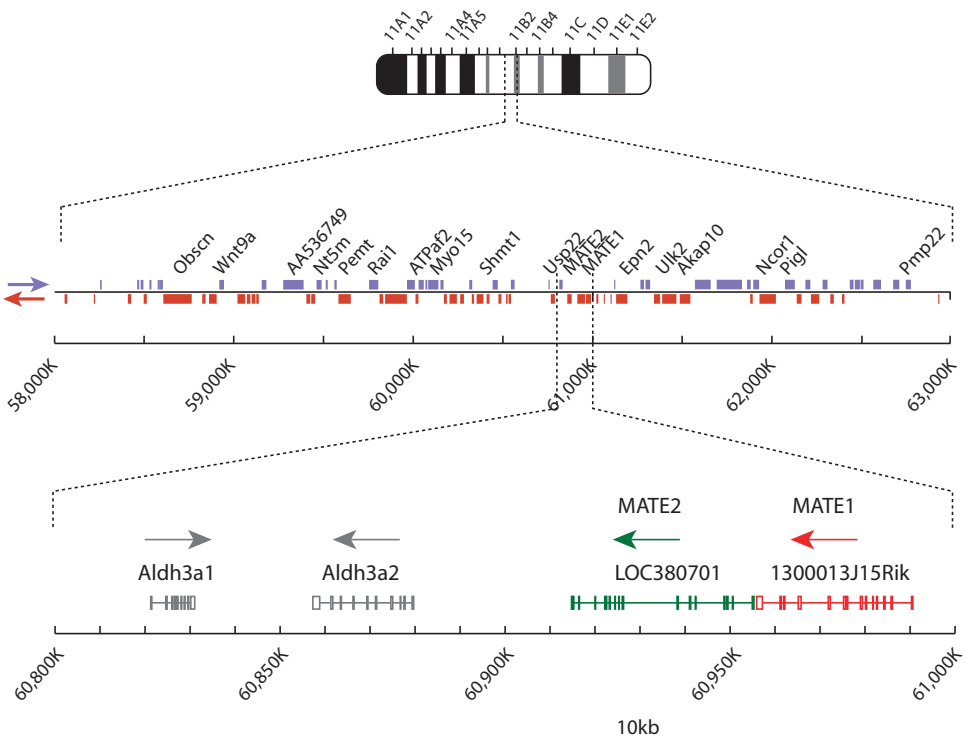

Supplement: pnas_0506483102_1.pdf [file pnas_0506483102_1.pdf]
